# Supplementary material
Source: Royal Society of Chemistry journal article supplement (doi:10.1039/d6sm00125d)
Supplement: d6sm00125d1.pdf [file d6sm00125d1.pdf]

Supplemental Information

Nanopore sequencing with proteins: synchronization and disynchronization of molecular dynamics simulations with laboratory and industrial developments

Zongan Wang<sup>1,3,6,7,10,11</sup> (王宗安), Yuqian Liu<sup>3,4,7</sup> (刘宇倩), Tao Zeng<sup>1,2</sup> (曾涛), Denghui Li<sup>3</sup> (李登辉), Xiao Shi<sup>1,2</sup> (师斌), Jiawen Zhang<sup>1,2</sup> (章佳文), Hao Wang<sup>1,2</sup> (王灏), Liuxin Shi<sup>1,2</sup> (史刘歆), Jiayuan Zhang<sup>2,5</sup> (张嘉远), Yinqi Bai<sup>3,6</sup> (白寅琪), Yuning Zhang<sup>1,2,10</sup> (张宇宁), Yuliang Dong<sup>1,2,7,9,10</sup> (董宇亮)

<sup>1</sup>State Key Laboratory of Genome and Multi-omics Technologies, BGI Research, Shenzhen 518083, China

<sup>2</sup>BGI Hangzhou CycloneSEQ Technology Co., Ltd., Hangzhou 310030, China

<sup>3</sup>BGI Research, Sanya 572025, China

<sup>4</sup>College of Life Sciences, University of Chinese Academy of Sciences, Beijing 100049, China

<sup>5</sup>State Key Laboratory of Genome and Multi-omics Technologies, BGI Research, Hangzhou 310030, China

<sup>6</sup>Hainan Technology Innovation Center for Marine Biological Resources Utilization (Preparatory Period), BGI Research, Sanya 572025, China

<sup>7</sup>Shenzhen Key Laboratory of marine biology genomics, BGI Research, Shenzhen 518083, China

<sup>8</sup>Shenzhen Key Laboratory of Bioenergy, BGI Research, Shenzhen 518083, China

<sup>9</sup>Shenzhen Engineering Laboratory for Molecular Enzymology, BGI Research, Shenzhen 518083, China

<sup>10</sup>Correspondence: wangzongan@genomics.cn (Z. W.), dongyuliang@genomics.cn (Y. D.), zhangyuning@genomics.cn (Y. Z.).

<sup>11</sup>Lead contact.

Supplemental table 1. Detailed List of research articles of studying  $\alpha$ HL related to DNA sequencing with simulations.

| Ref. | Nanopore                                                  | Year | Solute                                                                                        | Simulated system:<br>P + M + W + N + salt + E/F                                                                              | Simulation type:<br>Length of production run                     | Force field                                          |
|------|-----------------------------------------------------------|------|-----------------------------------------------------------------------------------------------|------------------------------------------------------------------------------------------------------------------------------|------------------------------------------------------------------|------------------------------------------------------|
| 1    | $\alpha$ HL                                               | 2004 | /                                                                                             | P (rigid) + implicit solvent + KCl + E (-150 to 150 mV)                                                                      | GCMC/BD + PNP: 13.875 $\mu$ s in total                           | CHARMM22                                             |
| 2    | $\alpha$ HL                                               | 2005 | /                                                                                             | Truncated P (rigid) + W + KCl + E (125 mV)                                                                                   | MD + PNP: 1 ns                                                   | Cornell 95 <sup>3</sup>                              |
| 4    | $\alpha$ HL                                               | 2005 | /                                                                                             | P + M (DPPC) + W + KCl + E                                                                                                   | AAMD: ~50ns                                                      | CHARMM27                                             |
| 5    | $\alpha$ HL                                               | 2005 | poly(dA) <sub>58</sub>                                                                        | P + M (DPPC) + W + N + KCl + E                                                                                               | AAMD: 50ns * 2 systems                                           | CHARMM27                                             |
| 6    | $\alpha$ HL, nanotube                                     | 2006 | ss-poly(dC) <sub>45</sub> , (dA) <sub>8</sub> , (dC) <sub>8</sub> , hetero-8mers              | P (CG, rigid) + implicit solvent + N (CG) + E (120 mV)                                                                       | BD + PNP: 100s $\mu$ s                                           | Customized                                           |
| 7    | $\alpha$ HL (WT & mutant)                                 | 2007 | /                                                                                             | P + implicit solvent + KCl + E ( $\pm$ 120 mV)                                                                               | MD + PNP: NA                                                     | Cornell 95                                           |
| 8    | $\alpha$ HL                                               | 2007 | ss-poly(dA) <sub>58</sub> , ss-poly(dA) <sub>58</sub> , ss-poly(dAdC) <sub>29</sub>           | P + M (DPPC) + W + N + KCl + E (1.2 - 13.2 V only applied to ssDNA)                                                          | AA G-SMD: Tens of ns                                             | CHARMM27                                             |
| 9    | $\alpha$ HL (WT & mutant)                                 | 2009 | ss-poly(A) <sub>25</sub> , ss-poly(dC) <sub>25</sub> , A1, dC1                                | P + M (POPC) + W + N + NaCl + F                                                                                              | cvSMD+JE: Tens of ns                                             | CHARMM27                                             |
| 10   | $\alpha$ HL (WT & 8 mutants)                              | 2011 | ss-poly(G) <sub>6</sub>                                                                       | Truncated P + M (methane slab) + W + N + NaCl + E (~600 mV)                                                                  | AAMD: >20 ns per traj.                                           | GROMOS96                                             |
| 11   | $\alpha$ HL, a cylindrical pore                           | 2012 | ss-poly(dA) <sub>n</sub> , ss-poly(dC) <sub>n</sub>                                           | GCMC/BD: P (rigid) + implicit solvent + N (CG) + KCl + E (50, 120, 200, 300 mV)<br>AAMD: P + M (POPC) + W + N (CG) + KCl + E | GCMC/BD: 1 - 5 $\mu$ s<br>AAMD: 100 ns                           | Customized                                           |
| 12   | $\alpha$ HL (WT & 3 mutants)                              | 2012 | ssDNA (Dickerson-Drew 12mer)                                                                  | Truncated P + M (methane slab) + W + N (CG) + NaCl + E (300 mV)                                                              | MD: 100 ns * 24 traj.                                            | AMBER99, AMBER99 + ParmBSC0, CHARMM27, GROMOS96 53A6 |
| 13   | $\alpha$ HL                                               | 2014 | ss-poly(A) <sub>25</sub> , ss-poly(dC) <sub>25</sub> , A1, dC1                                | P + M (POPC) + W + N + NaCl + F                                                                                              | cvSMD+JE: Several 1-ns sims.<br>ABF: 0.1 – 1 M integration steps | CHARMM22/27                                          |
| 14   | $\alpha$ HL (WT & mutant), Si <sub>3</sub> N <sub>4</sub> | 2014 | ss-poly(dA) <sub>40</sub> , ss-poly(dC) <sub>40</sub> , ss-poly(dT) <sub>40</sub> (2 orient.) | P (rigid) + implicit solvent + N (CG) + KCl + E (250 mV)                                                                     | GCMC/BD: 1 $\mu$ s * 25 sims.                                    | Customized                                           |
| 15   | $\alpha$ HL                                               | 2015 | DNA bases & phosphate group                                                                   | Truncated P + M (methane slab) + W + N + NaCl + F                                                                            | US: 40 $\mu$ s per fragment                                      | GROMOS 53a6                                          |
| 16   | $\alpha$ HL                                               | 2015 | CMP                                                                                           | P + M (DMPC) + W + N + NaCl + E (350 mV)                                                                                     | AAMD: 5 ns * 3600 sims. (9 dist. * 2 orient. * 20 per)           | GROMOS 53a6                                          |

(Continued from previous page)

|    |                      |      |                                                                                                                                     |                                                                                                                            |                                                                                            |                         |
|----|----------------------|------|-------------------------------------------------------------------------------------------------------------------------------------|----------------------------------------------------------------------------------------------------------------------------|--------------------------------------------------------------------------------------------|-------------------------|
| 17 | αHL (WT & 7 mutants) | 2016 | AAMD: ss-poly(dA) <sub>20</sub> ,<br>ss-poly(dC) <sub>20</sub><br>GCMC/BD: ss-poly(dA) <sub>40</sub> ,<br>ss-poly(dC) <sub>40</sub> | AAMD: Truncated P + M (DPPC) +<br>W + N + KCl + E (600 mV)<br>GCMC/BD: P + implicit solvent +<br>N (CG) + KCl + E (250 mV) | AAMD: 50 ns per sim. (10<br>conf. per pore, 2 orient. per<br>ssDNA)<br>GCMC/BD: several ms | CHARMM27,<br>Customized |
| 18 | αHL, ClyA            | 2017 | /                                                                                                                                   | P + M (DMPC) + W (CG) + NaCl                                                                                               | MARTINI: 20 / 22 μs for<br>ClyA / αHL<br>AAMD: 100 ns                                      | MARTINI v2.2            |
| 19 | αHL                  | 2018 | /                                                                                                                                   | P + M (DPhPC / POPC) + W + KCl<br>+ E (600 mV)                                                                             | AAMD: 250 ns * 11 traj.                                                                    | CHARMM36                |
| 20 | αHL                  | 2024 | ss-poly(dA) <sub>10-19</sub>                                                                                                        | P (CG) + M (DPPC) + W (CG) + N<br>(CG) + NaCl + F                                                                          | MARTINI: 24 μs in total                                                                    | MARTINI 2.2p            |
| 21 | αHL, AeL,<br>lysenin | 2025 | /                                                                                                                                   | Truncated P (CG) + M (PBD <sub>11</sub> PEO <sub>8</sub><br>+ DPhPC at 1:1 molar ratio, CG)                                | MARTINI: 18 μs per pore (3<br>traj. per. pore, 6 μs per<br>traj.)                          | Martini 3               |
| 22 | αHL                  | 2025 | ss-poly(dA) <sub>10, 16</sub> ,<br>ss-poly(dC) <sub>10, 13, 16</sub>                                                                | P (CG) + M (DPPC, CG) + W + N<br>(CG) + NaCl + F                                                                           | MARTINI: 36 μs in total                                                                    | MARTINI 2.2p            |

Acronyms are in accordance with Figure 4: P, pore; M, membrane; W, water molecule; N, nucleic acid or nucleotide; E, electric field; F, mechanical force. Abbreviations: GCMC, Grand-canonical Monte-Carlo; BD, Brownian dynamics; PNP, Poisson-Nernst-Planck electrodiffusion algorithm; AA, all-atom; MD, molecular dynamics; CG, coarse-grained; G-SMD, grid steered molecular dynamics; WT, wide-type; cvSMD, constant velocity steered molecular dynamics; JE, Jarzynski's equality; ABF, adaptive biasing force; US, umbrella sampling; NA, not available; DPPC, 1,2-dipalmitoyl-sn-glycero-3-phosphocholine; POPC, 1-palmitoyl-2-oleoylphosphatidylcholine; DMPC, 1,2-dimyristoyl-sn-glycero-3-phosphocholine; DPhPC, 1,2-diphytanoyl-sn-glycero-3-phosphocholine (CHARMM-GUI<sup>23</sup> code: PHPC); AeL, aerolysin; DOPC, 1,2-Dioleoyl-sn-glycero-3-phosphocholine; PBD-PEO, poly(1,2-butadiene)-b-poly(ethylene oxide).

Supplemental table 2. Detailed list of research articles of studying MspA and CsgG related to DNA sequencing with

simulations.

| Ref. | Nanopore                               | Year | Solute                                                                                                                                          | Simulated system:<br>P + M + W + N + salt + E/F                                                                                        | Simulation type:<br>Length of production run         | Force field |
|------|----------------------------------------|------|-------------------------------------------------------------------------------------------------------------------------------------------------|----------------------------------------------------------------------------------------------------------------------------------------|------------------------------------------------------|-------------|
| 17   | M1-MspA<br>& 3<br>mutants              | 2012 | poly(dC), poly(dT),<br>ssDNA (random 58mer)                                                                                                     | P (full & truncated) + M (POPC) +<br>W + N + KCl + E (1.2 V, 180 mV)                                                                   | AAMD: ~100 $\mu$ s in total                          | CHARMM27    |
| 18   | M1-MspA<br>& mutant                    | 2015 | ss-poly(dA) <sub>40</sub> , ss-<br>poly(dC) <sub>40</sub> , ss-poly(dT) <sub>40</sub>                                                           | P + implicit solvent + N (CG) + KCl +<br>E (-120 - 180 mV)                                                                             | GCMC/BD: NA                                          | Customized  |
| 19   | A96R-<br>MspA, M2-<br>MspA             | 2015 | AMP, GMP, CMP, TMP                                                                                                                              | Truncated P + M (methane slab) +<br>N + W + NaCl + F                                                                                   | US: 250 ns per window                                | GROMOS 53a6 |
| 20   | M1-MspA                                | 2016 | Truncated: 11mer 5'-<br>trans / 12mer 3'-trans<br>for poly(dT), poly(dA),<br>poly(dC) and mixed<br>Full: 5'-trans ss-<br>poly(dA) <sub>40</sub> | Truncated P + M (POPC) + W + N +<br>KCl + E (180 mV)<br>Full P + phi29 DNAP + M (POPC) +<br>W + N + dsDNA (12bp) + KCl + E<br>(180 mV) | AAMD<br>Truncated: >100 $\mu$ s<br>Full: 130 ns      | CHARMM36    |
| 21   | mutant of<br>M1-MspA                   | 2021 | ss-poly(dT) <sub>20</sub> with one<br>dA/dC/dG replaced at<br>different locations                                                               | P + M (DOPC) + W + N + KCl + E<br>(0.8 V)                                                                                              | AAMD: 24 ns per replica<br>* 3 replicas * 10 systems | CHARMM36    |
| 22   | $\alpha$ HL, M1-<br>MspA,<br>CsgG, AeL | 2020 | ss-poly(dA) <sub>15</sub>                                                                                                                       | P + M (POPC) + W + N + KCl + E<br>(300 mV)                                                                                             | AAMD: >100ns per<br>system                           | CHARMM36    |
| 23   | CsgG, CsgG<br>+ CsgF                   | 2021 | ss-poly(dA) <sub>12</sub> , ss-<br>poly(dT) <sub>12</sub>                                                                                       | AAMD: P + M (POPC) + W + KCl + E<br>(~0.9 V, ~1.6 V)<br>SMD: P + M (POPC) + W + N + KCl +<br>F                                         | AAMD: 4450 ns in total<br>SMD: 1160 ns in total      | CHARMM36m   |

Acronyms of (P, M, W, N, E/F) are in accordance with Figure 4. Abbreviations: A/T/C/GMP, adenosine / thymidine / cytidine / guanosine monophosphate; The rest are the same as in Supplemental table 1.

References

1. Noskov SY, Im W and Roux B. Ion permeation through the alpha-hemolysin channel: theoretical studies based on Brownian dynamics and Poisson-Nernst-Planck electrodiffusion theory. *Biophys J* 2004; 87: 2299-2309. DOI: 10.1529/biophysj.104.044008.
2. Cozmuta I, O'Keeffe JT, Bose D, et al. Hybrid MD-Nernst Planck model of  $\alpha$ -hemolysin conductance properties. *Molecular Simulation* 2005; 31: 79-93. DOI: 10.1080/08927020412331308467.
3. Cornell WD, Cieplak P, Bayly CI, et al. A second generation force field for the simulation of proteins, nucleic acids, and organic molecules. *Journal of the American Chemical Society* 1995; 117: 5179-5197. DOI: 10.1021/ja00124a002.
4. Aksimentiev A and Schulten K. Imaging alpha-hemolysin with molecular dynamics: ionic conductance, osmotic permeability, and the electrostatic potential map. *Biophys J* 2005; 88: 3745-3761. DOI: 10.1529/biophysj.104.058727.
5. Mathe J, Aksimentiev A, Nelson DR, et al. Orientation discrimination of single-stranded DNA inside the alpha-hemolysin membrane channel. *Proc Natl Acad Sci U S A* 2005; 102: 12377-12382. DOI: 10.1073/pnas.0502947102.
6. Muthukumar M and Kong CY. Simulation of polymer translocation through protein channels. *Proc Natl Acad Sci U S A* 2006; 103: 5273-5278. DOI: 10.1073/pnas.0510725103.
7. James O'Keeffe IC, Deepak Bose, Viktor Stolc. A predictive MD-Nernst-Planck model for transport in alpha-hemolysin: Modeling anisotropic ion currents. *Chemical Physics* 2007; 342: 25-32. DOI: 10.1016/J.CHEMPHYS.2007.09.013.
8. Wells DB, Abramkina V and Aksimentiev A. Exploring transmembrane transport through alpha-hemolysin with grid-steered molecular dynamics. *J Chem Phys* 2007; 127: 125101. DOI: 10.1063/1.2770738.
9. Martin HS, Jha S, Howorka S, et al. Determination of Free Energy Profiles for the Translocation of Polynucleotides through alpha-Hemolysin Nanopores using Non-Equilibrium Molecular Dynamics Simulations. *J Chem Theory Comput* 2009; 5: 2135-2148. DOI: 10.1021/ct9000894.
10. Bond PJ, Guy AT, Heron AJ, et al. Molecular dynamics simulations of DNA within a nanopore: arginine-phosphate tethering and a binding/sliding mechanism for translocation. *Biochemistry* 2011; 50: 3777-3783. DOI: 10.1021/bi101404n.
11. De Biase PM, Solano CJ, Markosyan S, et al. BROMOC-D: Brownian Dynamics/Monte-Carlo Program Suite to Study Ion and DNA Permeation in Nanopores. *J Chem Theory Comput* 2012; 8: 2540-2551. DOI: 10.1021/ct3004244.
12. Guy AT, Piggot TJ and Khalid S. Single-stranded DNA within nanopores: conformational dynamics and implications for sequencing; a molecular dynamics simulation study. *Biophys J* 2012; 103: 1028-1036. DOI: 10.1016/j.bpj.2012.08.012.
13. Martin HS, Jha S and Coveney PV. Comparative analysis of nucleotide translocation through protein nanopores using steered molecular dynamics and an adaptive biasing force. *J Comput Chem* 2014; 35: 692-702. DOI: 10.1002/jcc.23525.
14. De Biase PM, Markosyan S and Noskov S. Microsecond simulations of DNA and ion transport in nanopores with novel ion-ion and ion-nucleotides effective potentials. *J Comput Chem* 2014; 35: 711-721. DOI: 10.1002/jcc.23544.
15. Manara RM, Guy AT, Wallace EJ, et al. Free-energy calculations reveal the subtle differences in the interactions of DNA bases with alpha-hemolysin. *J Chem Theory Comput* 2015; 11: 810-816. DOI: 10.1021/ct501081h.
16. Manara RM, Tomasio S and Khalid S. The Nucleotide Capture Region of Alpha Hemolysin: Insights into Nanopore Design for DNA Sequencing from Molecular Dynamics Simulations. *Nanomaterials (Basel)* 2015; 5: 144-153. DOI: 10.3390/nano5010144.
17. Bhattacharya S, Derrington IM, Pavlenok M, et al. Molecular dynamics study of MspA arginine mutants predicts slow DNA translocations and ion current blockades indicative of DNA sequence. *ACS Nano* 2012; 6: 6960-6968. DOI: 10.1021/nn3019943.

18. De Biase PM, Markosyan S and Noskov S. BROMOC suite: Monte Carlo/Brownian dynamics suite for studies of ion permeation and DNA transport in biological and artificial pores with effective potentials. *J Comput Chem* 2015; 36: 264-271. DOI: 10.1002/jcc.23799.
19. Manara RM, Wallace EJ and Khalid S. DNA sequencing with MspA: Molecular Dynamics simulations reveal free-energy differences between sequencing and non-sequencing mutants. *Sci Rep* 2015; 5: 12783. DOI: 10.1038/srep12783.
20. Bhattacharya S, Yoo J and Aksimentiev A. Water Mediates Recognition of DNA Sequence via Ionic Current Blockade in a Biological Nanopore. *ACS Nano* 2016; 10: 4644-4651. DOI: 10.1021/acsnano.6b00940.
21. Yu M, Si W, Zeng T, et al. Unveiling the Microscopic Mechanism of Current Variation in the Sensing Region of the MspA Nanopore for DNA Sequencing. *J Phys Chem Lett* 2021; 12: 9132-9141. DOI: 10.1021/acs.jpcclett.1c02414.
22. Zhou W, Qiu H, Guo Y, et al. Molecular Insights into Distinct Detection Properties of alpha-Hemolysin, MspA, CsgG, and Aerolysin Nanopore Sensors. *J Phys Chem B* 2020; 124: 1611-1618. DOI: 10.1021/acs.jpcc.9b10702.
23. Rattu P, Glencross F, Mader SL, et al. Atomistic level characterisation of ssDNA translocation through the E. coli proteins CsgG and CsgF for nanopore sequencing. *Comput Struct Biotechnol J* 2021; 19: 6417-6430. DOI: 10.1016/j.csbj.2021.11.014.
